# Choosing panels of genomics assays using submodular optimization

Kai Wei<sup>1\*</sup>, Maxwell W. Libbrecht<sup>2\*</sup>, Jeffrey A. Bilmes<sup>1,2</sup>, and William Stafford Noble<sup>3,2</sup>

<sup>1</sup>Department of Electrical Engineering, University of Washington

<sup>2</sup>Department of Computer Science and Engineering, University of Washington

<sup>3</sup>Department of Genome Sciences, University of Washington

\*Contributed equally

January 6, 2016

## Abstract

Genomic sequencing assays such as ChIP-seq and DNase-seq can measure a wide variety of types of genomic activity, but the high cost of sequencing means that a panel of at most 3–10 assays is usually performed on each cell type. Therefore, the choice of which assay types to perform is a crucial step in any genomics project. We present *submodular selection of assays* (SSA), a method for choosing a diverse panel of genomic assays based on the observed pattern of correlations in existing assays. The method optimizes over *submodular functions*, which are discrete set functions that have properties analogous to certain continuous convex functions. SSA is computationally efficient, extremely flexible, and is theoretically optimal under certain assumptions. We find that SSA chooses panels of assay types that measure diverse activities, in one case nearly exactly replicating the panel selection choice made by the Roadmap Epigenomics consortium. To quantitatively evaluate SSA, we present a framework for evaluating the quality of a panel of assay types based on three common applications of genomics data sets: imputing assays that have not been performed, locating functional elements such as promoters and enhancers, and annotating the genome using a semi-automated method. Using this framework, we find that panels chosen by SSA perform better than alternative strategies. We therefore expect that SSA will replace manual selection as the first step of future genomics projects. In addition, this application may serve as a model for how submodular optimization can be applied to other discrete problems in biology.

## Introduction

Genomics assays such as ChIP-seq, DNase-seq and RNA-seq can measure a wide variety of types of DNA activity, but the cost of these assays limits their application. In principle, to fully characterize a cell type, one would like to perform every possible type of assay. However, at current sequencing prices, performing a single genomics assay with reasonable sequencing depth costs on the order of \$2,500 ([scienceexchange](http://scienceexchange.org)). As a point of comparison, consider the ENCODE and Roadmap Epigenomics consortia, which develop, perform and analyze genomics assays as their primary activity ([Bernstein et al., 2010](http://bernsteinlab.org); [ENCODE Project Consortium, 2012](http://encodeproject.org)). As of 2015 the two consortia have performed a total of 216 types of assays on at least one cell type, and at least one assay on a total of 228 cell types (Methods). Applying all these assay types to all these cell types would require 49,248 assays; however, the two consortia have performed just 1,359 assays, 5% of the possible number ([encodedcc.org](http://encodedcc.org); 2014). These consortia are worldwide efforts with large budgets; a typical lab might be able to perform at most several assays per cell type in order to analyze a particular tissue or perturbation that they are interested in. Moreover, there are virtually limitless perturbations and variations of a given cell type for which it would be interesting to examine the effect on DNA activity, including drug treatments, age, differentiation, etc.

Consequently, selecting a small panel of assays to perform on each cell type of interest—a problem we call *assay panel selection*—is a key step in any genomics project. To our knowledge there has been little discussion in the literature of how to choose such a panel. In consortia such as ENCODE and Roadmap, the procedure for choosing which assay types to perform on each cell type is typically ad hoc. These decisions

are made by the investigators involved, based on their intuition about the diversity of assay types, perhaps based on pairwise correlations between assays or similar simple metrics. Ernst and Kellis (Ernst and Kellis, 2015) proposed that imputation methods can be used to prioritize assay types that are hard to impute given the others, but did not propose a specific formula for comparing two panels nor a method for selecting a panel other than exhaustive search.

In this work, we propose a principled method to solve the assay panel selection problem. Qualitatively, the method aims to identify, on the basis of existing data sets, assay types that yield complementary views of the genome. In practice, many pairs of assay types yield redundant information. For example, the transcription factors REST and RCOR1 are cofactors and therefore bind almost the same set of genomic positions (Andrés et al., 1999). Similarly, the histone modification H3K36me3 primarily marks gene bodies, which are also transcribed and therefore measured by RNA-seq. Therefore, a great deal of what can be learned from the full set of assays can likely be learned by performing a small subset of the possible assays. This redundancy among assay types suggests that a carefully chosen panel of assays is likely to produce most of the information that performing all assays would. In general, the smallest complete high quality panel of assays measures all types of genomic activity in a given cell type at a minimal total cost. Our solution to the assay panel selection problem is composed of two parts: an objective function that defines the quality of a panel, and an optimization algorithm that efficiently finds a panel that scores highly according to the objective function.

The objective function that we propose to use, called *facility location* (defined mathematically below), measures what fraction of the information available in the full set of assay types is contained within the panel. This function has been previously applied in many fields, including document summarization (Lin and Bilmes, 2012), feature selection (Liu et al., 2013), and exemplar based clustering (Mirzasoleiman et al., 2013). This function also corresponds to the objective function of the widely-used *k*-medoids clustering problem (Gomes et al., 2010). The facility location function is based on a matrix of similarities between assay types; we define this similarity as the Pearson correlation between the two assay types, averaged over the cell types in which both have been performed.

To optimize the facility location function, we borrow methods from the field of *submodular optimization*. A simple approach to selecting a panel of assays would compute the facility location function valuation for every possible subset of assays and choose the highest-performing panel. Unfortunately, 216 possible assay types yield  $2^{216} \approx 10^{65}$  possible panels of assays, so it is necessary to use a method for selecting a panel that does not involve enumerating all possible panels. Such an efficient selection method exists because the facility location function has the property of *submodularity*. The property of submodularity (defined mathematically below) is analogous to the property of convexity but is defined on discrete set functions rather than continuous functions. Submodular functions have a long history in economics (Vives, 2001; Carter, 2001), game theory (Topkis, 1998; Shapley, 1971), combinatorial optimization (Edmonds, 1970; Lovász, 1983; Schrijver, 2004), electrical networks (Narayanan, 1997), operations research (Cornuéjols et al., 1990), and more recently, machine learning (Narasimhan and Bilmes, 2005; Krause et al., 2008; Liu et al., 2013; Wei et al., 2014), but they are not yet widely used for problems in biology. Therefore, this application may serve as a model for how submodular optimization can be applied to biological problems more generally.

We apply existing submodular optimization algorithms to the facility location function to efficiently select a high-quality panel of assays, a method we call *submodular selection of assays* (SSA). There exists a large literature of methods for optimizing submodular functions. The optimization method we employ is very efficient and is theoretically guaranteed to find a solution that comes within a constant factor in quality of the optimal solution (Nemhauser et al., 1978a).

In addition to proposing solutions to the assay panel selection problem, an important contribution of this work is development of three general methods for evaluating the quality of a selected panel of assays. These three methods correspond to three distinct practical applications of the selected panel: (1) the accuracy with which the panel can be used to impute the results of assays not included in the panel; (2) the accuracy with which the panel can be used to detect functional elements such as transcription factor binding sites, promoters, and enhancers; and (3) the quality of a whole-genome annotation produced using the panel. These evaluation metrics share the property that an informative and diverse set of assay types yields better performance, according to each metric, than does a redundant set. Note that these evaluation metrics differ from the objective function because they use information that is not available at the time a panel is chosen; therefore, the evaluation metrics themselves cannot be used directly to choose a panel. These three metrics

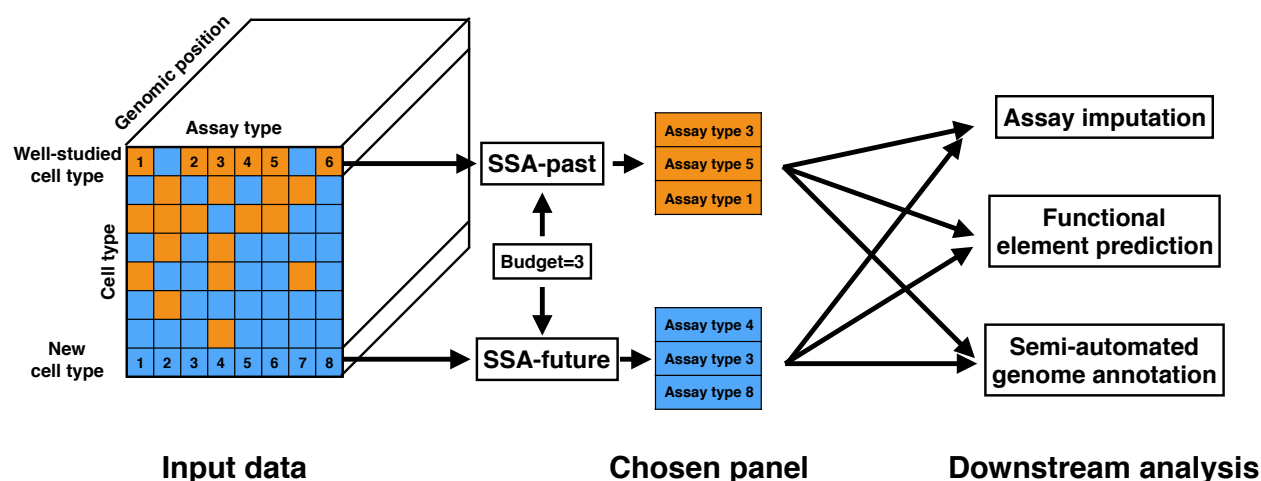

Figure 1: Schematic of genomics assay panel selection process performed by Submodular Selection of Assays (SSA). The method takes as input all available existing genomics assays, where each assay is represented as a real-valued track over the genome. In the selection of past assays mode, SSA selects a panel of already-performed assays to use as input to an expensive computational analysis. In the selection of future assays mode, SSA chooses a panel of assay types to be performed in a new cell type. In both cases, the resulting data sets are input into downstream analysis, which may include imputing assays that weren’t performed, predicting the locations of functional elements, and semi-automated genome annotation.

will be useful for any future study of the quality of a panel of assays, independent of the particular procedure used to choose such a panel.

We consider two variants of the assay panel selection problem. We are primarily interested in the “future” variant, which arises when a researcher is interested in applying a panel of genomics assays to a new tissue type or cellular condition. In this case, the researcher must use previously performed assays in other cell types to choose a representative panel of assay types. We also consider the “past” variant, which arises when a researcher is interested in applying a computationally expensive analysis, such as a genome annotation method, that cannot efficiently be run on all available data sets. The researcher must therefore choose a representative panel of the available data to use as input to the analysis. In this case, the researcher may use the data from assays performed on the cell type in question to inform their choice. We propose two variants of the method, SSA-future and SSA-past, each of which applies to the three evaluation metrics. In this manuscript we will focus on the future setting unless otherwise specified.

## Results

### Submodular selection of assays (SSA) identifies diverse panels of genomics assays

Submodular selection of assays (SSA) takes as input a collection of genomics data sets and identifies a high-quality subset of those assays (Methods, Figure 1). Each input data set is represented as a real-valued signal vector over the genome. SSA begins by computing a pairwise similarity matrix that contains, for each pair of assays, the mean Pearson correlation over all cell types in which both assays have been performed. The method employs a submodular function, called *facility location* (Methods), to estimate the quality of any possible panel of assay types. The facility location function takes a high value for a particular panel when all assay types have at least one similar representative in the panel. SSA then applies the *greedy submodular optimization* algorithm (Methods) to efficiently choose a panel of assays that maximizes this facility location

function. The output of this method is an ordered list of assay types, where the top  $k$  assay types in this list represent a high-quality panel of size  $k$ .

We found that applying SSA results in assay panels with diverse genomic functions. Because researchers generally perform panels of either histone modifications or transcription factor ChIP-seq assay types but rarely perform mixed panels, we ran the method separately on transcription factor and histone modification types. When choosing from transcription factors, SSA chooses factors that engage in diverse regulatory pathways (Figure 2B). The vast majority of transcription factors in our data set bind to promoters and enhancers and regulate the transcription of RNA Pol II-transcribed genes. The top five transcription factors chosen by SSA includes three of these factors, each of which regulate very different regulatory pathways: SMARCB1, an ATP-dependent chromatin remodeler; PML, a tumor suppression factor; and STAT5A, a factor involved in developmental signal transduction (UniProt Consortium, 2014). The top five also includes CTCF and BRF2. CTCF, part of the cohesin complex, regulates chromatin conformation and enhancer-promoter insulation and only about half of its binding sites occur in promoters or enhancers. BRF2 is part of the RNA Polymerase III complex, which transcribes rRNA, tRNA and other small RNAs. Therefore these two factors represent very different types of regulatory activity from most other factors in the data set and therefore are important to include in a diverse panel.

When choosing from histone modifications, SSA chooses marks that cover diverse types of genomic regions (Figure 2A,C). The top six histone modifications include a promoter mark (H3K4me3), an enhancer mark (H3K4me1), a gene mark (H3K79me2) and marks both known types of repressive domains, facultative (H3K27me3) and constitutive (H3K9me3) heterochromatin. The top six includes two different marks of transcription, H3K79me2 and H3K36me3, but these two modifications mark different parts of genes and are regulated differently relative to the gene's level of transcription (Li et al., 2007). As expected, SSA ranks additional measures of regulation (H3K4me2, H2A.Z, H3K9ac and H3K27ac) low on the list because these marks are duplicative of the regulatory marks H3K4me1 and H3K4me3.

Moreover, SSA almost exactly recapitulates the panel of histone modifications chosen by the Roadmap Epigenomics consortium (bolded font in Table 2C). This consortium chose a set of five “core” histone modifications to assay across 111 human primary tissues. This choice was made by the organizers of this consortium based on the expert knowledge of these researchers. These five core histone modifications ranked among the top six modifications chosen by SSA. In fact, the SSA-chosen and Roadmap-chosen sets have very similar scores according to the facility location function, ranking 1 and 16 respectively out of all  $\binom{11}{5} = 2772$  possible panels of five histone modifications. Therefore SSA closely reproduces careful, manual selection by experts in an entirely automated and data-driven way.

### Three metrics evaluate the quality of a set of genomics assays.

In order to quantitatively evaluate SSA, we developed an evaluation framework for assay panel selection. We focused on three of the most common downstream applications of genomics data sets: (1) imputing assays that haven't been performed, (2) locating functional elements such as promoters and enhancers, and (3) annotating the genome using a semi-automated method. We describe each metric briefly here, with full details provided in Methods.

The first evaluation metric, *assay imputation*, measures how well a chosen panel of assays can be used to predict assays that have not been performed. We train a regression model to predict each assay outside of the panel on the basis of the assays within the panel, using random subsets of the genome for training and testing, respectively. High performance on the assay imputation metric indicates that the panel contains all of the information in the assays outside of the panel. Moreover, recent work on imputation has showed that it is often effective to train a regression model on data from reference cell types and apply it to a target cell type (Discussion).

The second evaluation metric, *functional element prediction*, measures how well a chosen panel of assays can be used to locate functional elements such as promoters and enhancers. Because there are few validated examples of each type of element, we use experimentally determined binding of transcription factors, as measured by transcription factor ChIP-seq, as a proxy for functional elements. We train a classifier model to predict the locations of these elements on the basis of the assays within the panel. High performance on the functional element prediction metric indicates that a panel can be used to accurately locate functional elements. Although both the assay imputation and functional element prediction evaluation metrics aim

A

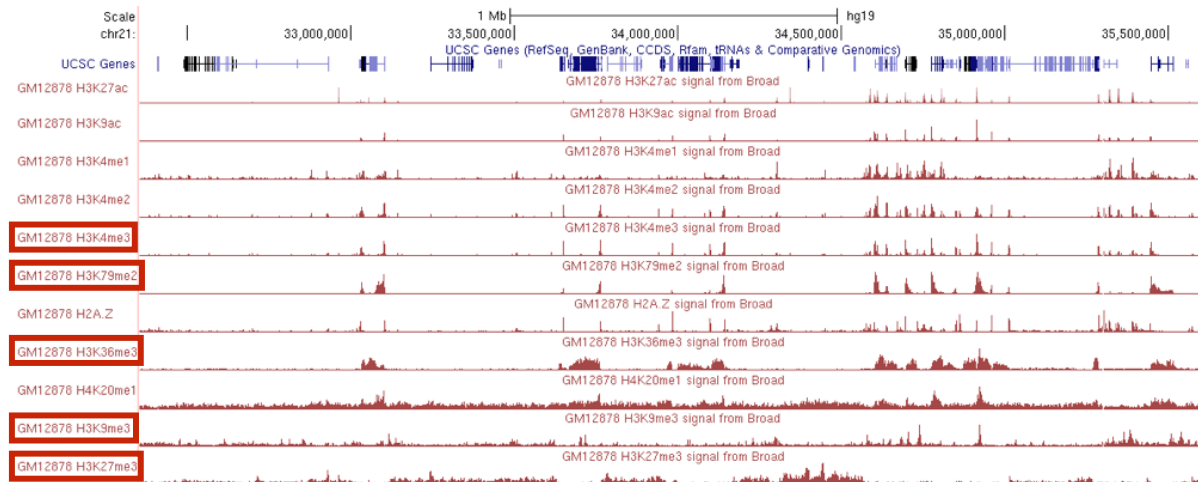

B

| Choice order | Transcription factor | Function                              |
|--------------|----------------------|---------------------------------------|
| 1            | SMARCB1              | ATP-dependent chromatin remodeling    |
| 2            | PML                  | Tumor suppression                     |
| 3            | STAT5A               | Developmental signal transduction     |
| 4            | CTCF                 | Chromatin conformation and insulation |
| 5            | BRF2                 | RNA polymerase III initiation complex |

C

| Choice order | Histone modification | Association                  |
|--------------|----------------------|------------------------------|
| 1            | <b>H3K4me3</b>       | Promoters                    |
| 2            | H3K79me2             | Transcription                |
| 3            | <b>H3K9me3</b>       | Constitutive heterochromatin |
| 4            | <b>H3K27me3</b>      | Facultative heterochromatin  |
| 5            | <b>H3K36me3</b>      | Transcription                |
| 6            | <b>H3K4me1</b>       | Enhancers                    |
| 7            | H3K4me2              | Regulatory                   |
| 8            | H3K9ac               | Regulatory                   |
| 9            | H2A.Z                | Promoters                    |
| 10           | H4K20me1             | Transcription                |
| 11           | H3K27ac              | Regulatory                   |

Figure 2: (A) Redundancy in histone modification signal in the genome. The top five assay types chosen by SSA are boxed in red. (B,C) Panels of assays chosen by SSA-future, for (B) only transcription factors and (C) only histone modifications. Each list is in the order assigned by SSA; for any size  $k$ , the top  $k$  assay types in the list are the chosen panel of this size. Because there are 80 transcription factors, we display just the top five chosen by SSA; there are only eleven histone modifications, so we can display the full list. Associations are summarized from UniProt (UniProt Consortium, 2014). Bold font indicates those chosen by the Roadmap Epigenomics consortium.



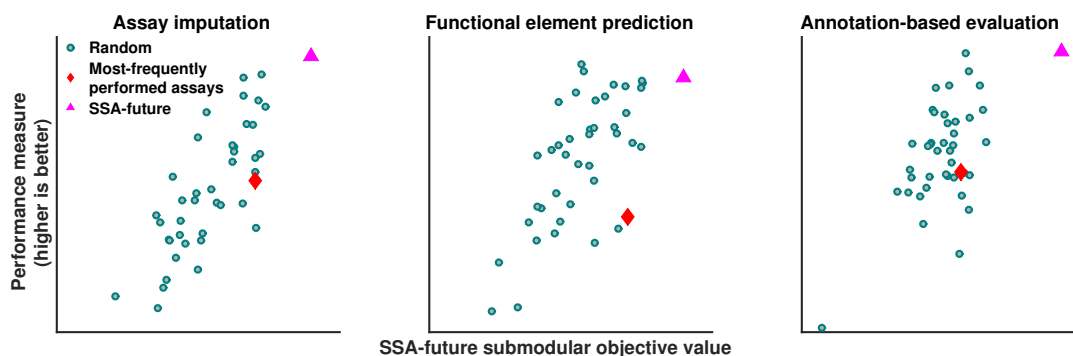

Figure 3: Relationship between the facility location objective function and evaluation metrics. Each dot corresponds to one of 40 randomly-chosen panels. Pink triangle indicates results from maximizing the SSA-future facility location function; red diamond indicates the panel of most-frequently performed assay types (Supplementary Table 1). These results were computed in GM12878, using panels of four assay types.

to predict genomics data sets, functional element prediction focuses on the small fraction of the genome corresponding to transcription factor binding sites.

The third evaluation metric, *annotation-based evaluation*, measures how effectively a given panel can be used to annotate the genome through a semi-automated genome annotation (SAGA) method. SAGA methods, which include HMMSeg (Day et al., 2007), ChromHMM (Ernst and Kellis, 2010), Segway (Hoffman et al., 2012) and others (Thurman et al., 2007; Lian et al., 2008; Filion et al., 2010), annotate the genome on the basis of a panel of genomics assays. They simultaneously partition the genome and annotate each segment with an integer label such that positions with the same label exhibit similar patterns of activity. These methods are semi-automated because a person must interpret the biological meaning of each integer label. SAGA methods have been shown to recapitulate known functional elements including genes, promoters and enhancers. Given a particular panel of assays, we perform annotation-based evaluation by using this panel as input to Segway and measuring how well the resulting genome annotation corresponds to patterns observed in the assays outside of the panel. High performance on this metric indicates that the chosen panel can be used to produce a comprehensive annotation of the genome.

Applying these metrics to evaluate a method for choosing panels is complicated by two factors. First, no cell type has had all assay types performed in it, so we perform evaluation separately on each cell type in order to evaluate against all available assay types. Second, these evaluation metrics must be used to compare to assays outside of the panel, so we use a cross-validation strategy in which we hold out a *target set* for evaluation and choose panels from the remaining *source set*, repeating this process for many choices of target set. This evaluation strategy enables principled evaluation that compares all methods against the same held-out standard while using only the available data sets (Methods, Figure 5).

## Panels chosen by SSA outperform alternative methods according to three evaluation metrics.

We applied this panel evaluation framework to evaluate SSA. To determine the most effective objective function, we compared the facility location function and four other potential objective functions based on the pairwise similarity matrix (Figure 3). We found that the facility location function had a higher Spearman correlation with the three evaluation metrics than the other objective functions we tried, and this trend was consistent across multiple cell types. In addition, we found that the facility location function had the best correlation with the three evaluation metrics when we defined the similarity between a pair of assay types as the mean Pearson correlation between this pair, as opposed to the median, maximum or other aggregation function. These observations led us to choose SSA’s facility location objective function because they show that this function accurately measures the quality of a given panel while using only data available from reference cell types.

To compare SSA to alternative panel selection approaches, we compared its performance on our three

A

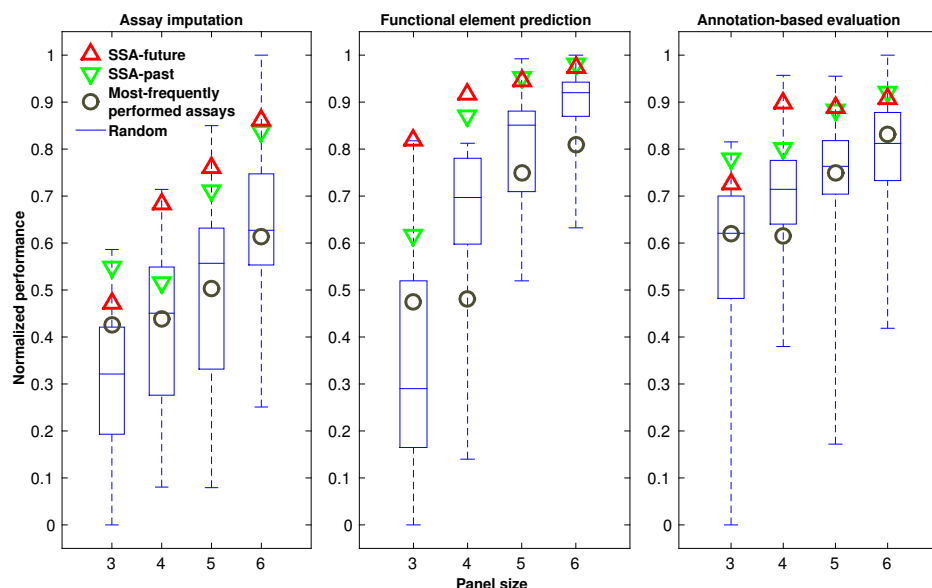

B

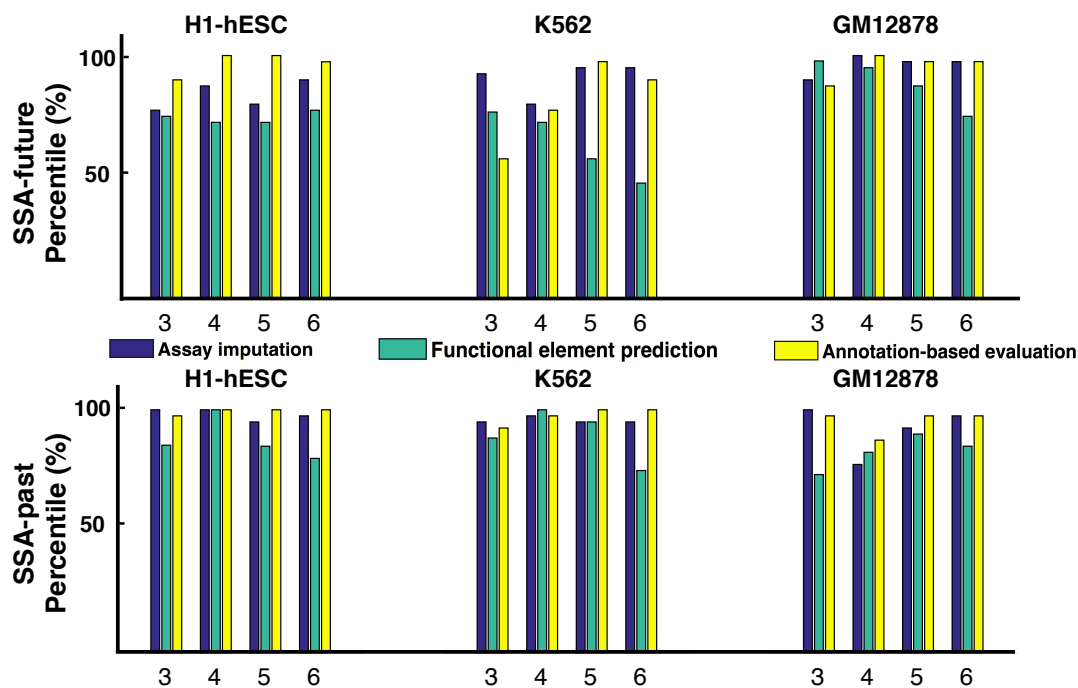

Figure 4: (a) Performance of panel selection strategies on cell type GM12878. Boxplots show the distribution of evaluation metrics over 40 random panels. The panels of most-frequently performed assays are composed of top  $k$  most frequent assay types available in our data set, where  $k$  is the size of the panel. Each evaluation metric is normalized to lie within  $[0, 1]$  by subtracting the lowest value and dividing by the highest. (b) Performance of SSA relative to an estimate of the performance on all possible panels. The vertical axis shows the fraction of panels that perform worse than the SSA-chosen panel for a given setting, estimated by comparing to 40 randomly-selected panels.

evaluation metrics. We found that the panels reported by SSA perform within the top few percent of an estimate of the performance on all possible panels, and this high performance is consistent across panel sizes, evaluation cell types and performance metrics. We found that SSA also greatly outperforms the panel of most-frequently performed assay types, which is a reasonable surrogate for the panel that might be chosen by manual selection (Figure 4; Supplementary Table 1). This commonly-performed panel actually performs worse than the average panel in many cases, which may be a consequence of the fact that the most commonly-performed assay types measure broad marks of regulation such as histone modifications and DNA accessibility which do not have the specificity to identify pathway-specific elements. These results demonstrate quantitatively that panels chosen by SSA are effective when applied to their most common downstream tasks.

## SSA can additionally be used to select a subset of performed assays as input to an expensive analysis

So far we have considered panel selection in the “future” setting where a researcher is planning to experimentally perform a panel of assay types. Panel selection is sometimes also important in the “past” setting where a researcher wishes to apply a computationally expensive analysis that cannot be efficiently applied to all assays together and therefore must be applied to a smaller panel. For example, training a statistical model to perform semi-automated genome annotation jointly on dozens of assays across many cell types is computationally expensive. A strategy in which each cell type is represented by a smaller panel of assays might yield very similar annotations using fraction of the computational resources. In this setting, the assays themselves are available to the selection algorithm, so we compute the similarity matrix based on these values themselves (SSA-past) rather than estimating the similarities by aggregating across cell types (SSA-future). Importantly, in the selection of past assays case, a different panel can be selected for each cell type, based on the available data. To test SSA in the past setting, we used the same evaluation strategy as in the future setting, but using the source assays themselves to compute the similarity matrix. SSA performs consistently well according to these metrics, and it performs slightly better on some cell types in the past than the future setting due to the availability of this additional information (Figure 4B).

## Discussion

The availability of a large number of types of genomics assays means that choosing a panel of genomics assays is a key step in any genomics project. Previously, these panels were chosen in an ad hoc fashion. We have developed Submodular Selection of Assays (SSA), a method for choosing high-quality panels using submodular optimization. This method is computationally efficient, results in high-quality panels according to several quality measures, and is mathematically optimal under some assumptions. By applying SSA, researchers can now easily choose a high-quality panel of assay types to perform on any cell type of interest. These higher-quality panels will allow researchers to achieve the same utility from performing fewer assays, saving thousands of dollars in labor and reagent costs per cell type.

This panel selection framework can also be used partway through the investigation of a cell type, when several assays are already available. By modifying the facility location function to include the availability of these assays, SSA can be used to determine the most-informative next experiments to perform. In doing so, SSA will take into account the information in these existing assays and choose additional assay types that measure distinct genomic features.

In this manuscript, we focused on optimizing the facility location function. However, the same submodular optimization framework can be used to optimize other objective functions that may prove to be more relevant for certain applications. Several other functions may be useful in practice. First, if some assays are more expensive or time consuming than others, the objective function can be modified to incorporate this cost. Second, if some assays are inherently preferable to others, for example because they have better-established processing pipelines, the objective can incorporate this preference and trade off choosing both diverse and established assay types. Third, entirely different types of panel attributes may be valuable for a particular application, which can be formalized as a different objective function (such as the alternatives we discuss in Supplementary Note 1). As long as the resulting objective function remains submodular, it will be



efficiently optimizable using either the greedy algorithm for monotone non-decreasing functions or other efficient methods (Buchbinder et al., 2012, 2014) for non-monotone functions. Moreover, such modifications are intuitive to design and easy to implement.

The facility location function can also be used to guide manual assay panel selection. A researcher may seek to optimize hard-to-quantify characteristics of a panel such as familiarity with the protocols involved or the panel's concordance with panels performed on other cell types. In this case, the researcher may choose to perform a panel that has slightly poorer quality as measured by the facility location function in order to optimize these other criteria.

The evaluation strategy we introduce here can be used to evaluate any proposed strategy for panel selection, whether or not this method is based on submodular optimization. This framework is composed of two parts. First, a cross-validation strategy allows for principled comparison of methods under the restriction that not all assays are available in all cell types, and that a panel must not be evaluated on an assay type that it contains. Second, three distinct metrics capture the three primary downstream applications of genomics data sets.

The method we describe is similar in some ways to the imputation-based assay type prioritization strategy proposed by Ernst and Kellis (Ernst and Kellis, 2015). This proposed strategy prioritizes assay types that are hardest to impute from the existing assays. In that way, this imputation-based strategy is similar to performing panel selection based just on our assay imputation evaluation metric. However, SSA has two advantages over this imputation-based strategy. First, the imputation-based comparison can only be used when all assay types under consideration have all been performed in the same cell type, a restriction that does not apply to SSA because of its similarity matrix aggregation strategy. Second, selecting a panel of assays using this imputation-based strategy requires performing a separate imputation procedure on all  $2^N$  possible panels, which is hopelessly computationally expensive.

One limitation of any data-driven analysis like this one is that they are limited by any imperfections in the data sets used. For example, if all available assays of a given type happen to be of particularly good or poor quality, the correlations associated with this assay type will appear to the algorithm to be particularly strong or weak respectively. Similarly, any mislabeled assays, batch effects, or other artifacts may also influence whether certain assay types will be chosen in a panel. Future assays of that type may not be expected to have the same artifactual patterns, so the resulting panels could be suboptimal. Therefore it is always important to scrutinize the results of data driven approaches like this one to understand whether patterns in the available data are predictive of future experiments. Modifications of this approach that, for example, find and remove faulty assays before input into the algorithm might result in different panels. However, our evaluation metrics are also entirely data-driven, so we cannot use them to explore these issues.

Finally, we hope that this work can serve as a model for how submodular optimization can be applied to other problems in biology. As with convex optimization, the same toolbox of submodular optimization methods can be applied to a wide variety of problems, and any innovations to this toolbox improve all solutions. For this reason, submodular optimization is widely used for discrete problems in other fields. However, it is not yet widely used in biology. Therefore we expect that in the future, submodular optimization will be used for other discrete problems in biology, such as for selecting panels of DNA mutations to test in a functional screen or removing redundancy in protein sequence data sets.

## Methods

### Genomics data

We acquired all public genomics data from the ENCODE (<http://hgdownload.cse.ucsc.edu/goldenPath/hg19/encodeDCC/>) and Roadmap Epigenomics (<https://sites.google.com/site/anshulkundaje/projects/epigenomeroadmap>) projects as of January 2015. These data sets were processed by the two consortia into real-valued data tracks, as described previously (Hoffman et al., 2013; Kundaje et al., 2015). We omitted all assays with more than 1% unspecified positions, which may indicate errors during processing or mapping. We manually curated these assays to unify assay type and cell type terminology and, when multiple assays were available, we arbitrarily chose a representative assay for each (cell type, assay type) pair. This procedure resulted in a total of 1,359 assays comprised of a total of 216 assay types and 228 cell types. The assay types include ChIP-seq with a variety of targets (both histone modification and transcription factor),

DNase-seq, FAIRE-seq, Repli-seq and RNA-seq. The full list of assays is given as supplementary data. We applied the inverse hyperbolic sine transform  $\text{asinh}(x) = \ln(x + \sqrt{x^2 + 1})$  to all signal data. This function has the compressing effect of a function like  $\log x$  for large values of  $x$  but it is defined at zero and has much less of a compressing effect for small values. The asinh transform has been shown to be important for reducing the effect of large values in analysis of genomics data sets (Johnson, 1949; Hoffman et al., 2012). Transcription factor ChIP-seq peaks were called by each consortium for each factor using MACS using an irreproducible discovery rate (IDR) threshold of 0.05 (Zhang et al., 2008; Landt et al., 2012).

## Notation

We use the following notation below to facilitate the description of our method. We use the term “assay type” to mean a particular genomics assay protocol that may be performed in any cell type (for example “ChIP-seq targeting H3K27me3”) and “assay” to mean a particular assay type performed in a particular cell type. The term “cell type” refers to any cellular state that may be queried with a genomics assay, which may refer to any combination of cell line, tissue type, disease state (such as cancer), individual, or drug perturbation. We refer to a cell type as  $c$  and the entire set of all cell types as  $\mathcal{C}$  ( $|\mathcal{C}| = 228$ ). We use  $a$  to refer to an assay type,  $A$  for a subset of assay types, and  $\mathcal{A}$  for the set of all assay types ( $|\mathcal{A}| = 216$ ). We use  $s$  to denote a single assay (that is, a given assay type performed in a given cell type),  $S$  for a set of assays, and  $\mathcal{S}$  as the set of all available performed assays. Given any cell type  $c \in \mathcal{C}$  we define the set of assay types performed in this cell type as  $\mathcal{A}^c$  and the corresponding assays as  $\mathcal{S}^c$ . We define  $I = \{1, \dots, n\}$  as the set of all positions in a genome. An assay  $s$  is represented as a vector of length  $n$ ; i.e.,  $s \in \mathbb{R}^n$ . We denote its  $i$ th entry (i.e., the value of assay  $s$  at genomic position  $i$ ) as  $s(i)$ .

## Submodular optimization

A *submodular* function (Fujishige, 2005) is defined as follows: given a finite size  $m$  set  $V = \{1, 2, \dots, m\}$ , a discrete set function  $f : 2^V \rightarrow \mathbb{R}$  that offers a real value for any subset  $S \subseteq V$  is submodular if and only if:

$$f(S) + f(T) \geq f(S \cup T) + f(S \cap T), \forall S, T \subseteq V. \quad (1)$$

Defining  $f(s|S) \triangleq f(s \cup S) - f(S)$ , submodularity can equivalently be defined as  $f(s|S) \geq f(s|T)$ ,  $\forall S \subseteq T$  and  $s \notin T$ . That is, the incremental gain of adding item  $s$  to the set decreases when the set to which  $s$  is added to grows from  $S$  to  $T$ . In this work, the whole set  $V$  represents a set of genomics assays and the set function  $f(S)$  represents a measure of quality of a subset of assays  $S \subseteq V$ .

Two other properties of set functions are relevant to this setting. First, a set function  $f$  is defined as *monotone non-decreasing* if

$$f(s|S) \geq 0, \forall s \in V \setminus S, S \subseteq V. \quad (2)$$

Second, we say that  $f$  is *normalized* if  $f(\emptyset) = 0$ .

In this work we are interested in the problem of maximizing a submodular function subject to a constraint on the size of the reported set. That is, we are interested in solving the problem

$$\text{maximize } f(S), \quad \text{subject to } |S| \leq k \quad (3)$$

for some integer  $k \leq |V|$ . In this work, we require that  $f$  is submodular, monotone-nondecreasing and normalized.

While this problem is NP-hard, it can be approximately solved by a simple greedy algorithm with a worst-case approximation factor  $(1 - e^{-1})$  (Nemhauser et al., 1978b). This is also the best solution obtainable in polynomial time unless  $P = NP$  (Feige, 1998). The algorithm starts with the empty set  $S_0 = \emptyset$  and at each iteration  $i$  adds the element  $s_i$  that maximizes the conditional gain  $f(s_i|S_{i-1})$  with ties broken arbitrarily (i.e., finding  $s_i \in \arg\max_{e \in V \setminus S_{i-1}} f(e|S_{i-1})$ ) and then updates  $S_i \leftarrow S_{i-1} \cup \{s_i\}$ . The algorithm stops when the cardinality constraint is met with equality. The running time of this algorithm can be improved from using a quadratic number of function evaluations to a near-linear number without any performance loss by further exploiting the submodularity property (Minoux, 1978).

## Facility location function

In this work we use the *facility location* function to measure the quality of panel of assay types. The facility location function (Cornunéjols et al., 1990)  $f_{\text{fac}} : 2^V \rightarrow \mathbb{R}$  is defined as follows:

$$f_{\text{fac}}(S) = \sum_{s' \in V} \max_{s \in S} r_{s',s}, \quad (4)$$

where  $r_{s',s}$  measures the pairwise similarity between assays  $s'$  and  $s$  (defined below). Intuitively, the facility location function takes a high value when every assay in  $V$  has at least one similar representative in  $S$ .

## Assay type similarity

We use the following strategy to define the similarity between each pair of assay types in order to use this similarity to define a facility location function. We define this similarity differently depending on the application: In the selection of past assays setting, the particular assays performed in the cell type of interest  $c$  are available, while in the selection of future assays setting we must estimate this similarity from reference cell types.

In the selection of past assays setting, we directly use the signal vectors  $s_i$  and  $s_j$  to derive the similarity. We define this similarity as  $r_{s_i,s_j} = |\rho_{s_i,s_j}| \in [0, 1]$ , where  $\rho_{s_i,s_j}$  is the Pearson correlation between the signal vector  $s_i$  and  $s_j$ . Pearson correlation is frequently used to evaluate the similarity between genomics assays (ENCODE Project Consortium, 2012). For efficiency, we compute the correlation measure  $\rho_{s_i,s_j}$  only across a subset of genomic positions  $I' \subseteq I$ , where  $I'$  is randomly subsampled from  $I$ , and  $|I'| \approx 0.01|I|$ .

In the selection of future assays setting, the assays in the cell type  $c$  are not available, but the assays performed in cell types other than  $c$ ,  $\mathcal{S} \setminus \mathcal{S}^c$ , are available. Let  $a_i, a_j \in \mathcal{A}$  be the assay types associated with the assay  $s_i$  and  $s_j$ , respectively. Let  $\mathcal{S}^{a_i}$  be the set of assays in  $\mathcal{S}$  with type  $a_i$ . We approximate the similarity between  $s_i$  and  $s_j$  by aggregating the pairwise similarity between assays in  $\mathcal{S}^{a_i} \setminus s_i$  and  $\mathcal{S}^{a_j} \setminus s_j$ . We consider six different aggregation strategies by taking the average, 0<sup>th</sup> percentile (min), 25<sup>th</sup> percentile, 50<sup>th</sup> percentile (median), 75<sup>th</sup> percentile, and 100<sup>th</sup> percentile (max) of these similarity scores sorted in non-decreasing order, which are defined below as  $r^1, r^2, r^3, r^4, r^5$ , and  $r^6$ :

$$r_{s_i,s_j}^1 \triangleq \frac{1}{|\mathcal{S}^{a_i} \setminus s_i|} \frac{1}{|\mathcal{S}^{a_j} \setminus s_j|} \sum_{s \in \mathcal{S}^{a_i} \setminus s_i} \sum_{s' \in \mathcal{S}^{a_j} \setminus s_j} |\rho_{s,s'}|, \quad (5)$$

$$r_{s_i,s_j}^2 \triangleq \text{percentile}(\{|\rho_{s,s'}| : s \in \mathcal{S}^{a_i}, s' \in \mathcal{S}^{a_j} \setminus s_j\}, 0), \quad (6)$$

$$r_{s_i,s_j}^3 \triangleq \text{percentile}(\{|\rho_{s,s'}| : s \in \mathcal{S}^{a_i}, s' \in \mathcal{S}^{a_j} \setminus s_j\}, 25), \quad (7)$$

$$r_{s_i,s_j}^4 \triangleq \text{percentile}(\{|\rho_{s,s'}| : s \in \mathcal{S}^{a_i}, s' \in \mathcal{S}^{a_j} \setminus s_j\}, 50), \quad (8)$$

$$r_{s_i,s_j}^5 \triangleq \text{percentile}(\{|\rho_{s,s'}| : s \in \mathcal{S}^{a_i}, s' \in \mathcal{S}^{a_j} \setminus s_j\}, 75), \quad (9)$$

$$r_{s_i,s_j}^6 \triangleq \text{percentile}(\{|\rho_{s,s'}| : s \in \mathcal{S}^{a_i}, s' \in \mathcal{S}^{a_j} \setminus s_j\}, 100), \quad (10)$$

$$(11)$$

where the function  $\text{percentile}(C, p)$  returns the  $p^{\text{th}}$  percentile of the items in the list  $C$  sorted in non-decreasing order. We chose to use the average correlation ( $r^1$ ) because the facility location function defined using similarities aggregated in this way correlated best with our evaluation metrics (Supplementary Note 2).

## Evaluation cross-validation strategy

We would prefer to apply our method once to select a single panel of assay types. However, doing so could result in a panel of assay types that have not been performed in any cell type (or very few cell types), which would prohibit evaluating the quality of this panel. Therefore, we apply a cross-validation strategy that repeatedly holds out a subset of assay types for evaluation and selects a panel from the remaining assay types, and we perform this cross-validation separately for each cell type in turn (Figure 5a). To evaluate the quality of our method with respect to a cell type  $c$ , we restrict ourselves to selecting from the set of assays

performed in  $c$  ( $\mathcal{S}^c$ ). We randomly partition  $\mathcal{S}^c$  into 10 equally-sized, disjoint folds. Of the 10 folds, a single fold is retained as the target set  $\mathcal{T}^c$ , and the remaining 9 blocks are used as the source set  $\mathcal{V}^c$ . We select a panel of assays  $S \subseteq \mathcal{V}^c$  from the source set  $\mathcal{V}^c$  and evaluate the panel on the assays relative to the target set  $\mathcal{T}^c$  using the three evaluation metrics described below. The process is then repeated ten times, with each of the ten folds used once as the target set. We average the ten results are averaged to produce a single number representing the performance.

## Assay imputation

The *assay imputation* evaluation metric measures the ability of a panel of assay types to be used to impute the results of other assay types outside the panel (Figure 5b). We formalize assay imputation metric as a regression problem in which the assays in the panel  $S$  are used as features to predict the target set assays,  $s' \in \mathcal{T}^c$ . In this regression problem we have one labeled example for each position in the genome.

As our regression model, we use support vector regression with a Gaussian kernel. To construct the training and test data, we randomly choose disjoint sets of genomic positions  $I^{Tr}, I^{Te} \subseteq I$ , where  $I^{Tr} \cap I^{Te} = \emptyset$ . In our experiments, we set  $|I^{Tr}| = 5,000$  and  $|I^{Te}| = 2,000$ . Given the panel  $S = \{s_1, \dots, s_{|S|}\}$ , a target assay  $s' \in \mathcal{T}^c$ , and the training genomic positions  $I^{Tr}$ , we create the training data as  $\mathcal{D}^{Tr} = \{x^i, y^i\}_{i \in I^{Tr}}$ , where  $x^i = [s_1(i), s_2(i), \dots, s_{|S|}(i)]^T$  and  $y^i = s'(i)$ . Similarly, the test data set is constructed as  $\mathcal{D}^{Te} = \{x^i, y^i\}_{i \in I^{Te}}$ . The hyperparameters of the regression model are tuned using 5-fold cross validation. We measure the performance of the trained model on the test data  $\mathcal{D}^{Te}$  as the squared correlation coefficient  $\theta_{s'}$ . We repeat this evaluation process for every target assay in  $\mathcal{T}^c$  and report the performance of the panel  $S$  as the average squared correlation coefficient  $\theta = \frac{1}{|\mathcal{T}^c|} \sum_{s' \in \mathcal{T}^c} \theta_{s'}$ .

## Functional element prediction

The *functional element prediction* evaluation metric evaluates how well a panel of assays can predict the genomic locations of functional elements such as promoters, enhancers and insulators. Because there are few validated examples of each type of element, we use experimentally-determined binding of transcription factors, as determined by transcription factor ChIP-seq peaks, as a proxy for functional elements. Most known types of functional elements can be characterized by the binding of particular transcription factors (Visel et al., 2009; Burgess-Beusse et al., 2002). Note that functional element prediction is similar to assay imputation in the sense that both evaluation metrics aim to predict the output of a genomics assay; however, functional element prediction focuses on just transcription factor binding sites, whereas assay imputation focuses on the whole genome. Similar to assay imputation, we consider this metric separately for each cell type. For an evaluation cell type  $c$ , we denote the set of transcription factor ChIP-seq assays performed in  $c$  as  $\hat{\mathcal{S}}^c \subseteq \mathcal{S}^c$ . Given a bi-partition of  $\mathcal{S}^c$  into the source set  $\mathcal{V}^c$  and the target set  $\mathcal{T}^c$ , we choose from the source set  $\mathcal{V}^c$  a panel of assays, and we evaluate functional element prediction only on the target assays in the set  $\hat{\mathcal{T}}^c = \mathcal{T}^c \cap \hat{\mathcal{S}}^c$ , in contrast to the assay imputation metric where all assays in  $\mathcal{T}^c$  are used for evaluation.

For a target transcription factor assay  $s \in \hat{\mathcal{T}}^c$ , let  $p$  be a binary vector  $\{0, 1\}^n$  indicating the genomic positions where  $s$  has a peak as called by the peak-calling algorithm. That is,  $p(i) = 1$  if there is a peak at position  $i$ , and  $p(i) = 0$  otherwise. We use a support vector machine (SVM) with Gaussian kernel to predict  $p$  given a panel of assays  $S \subseteq \mathcal{V}^c$ . For a given testing factor  $p$ , we refer to the positions where  $p = 1$  as  $I_+$  and the set of positions where  $p = 0$  as  $I_- = I \setminus I_+$ . We randomly choose  $I_+^{Tr} \subseteq I_+$  and  $I_-^{Tr} \subseteq I_-$  as the positive and negative positions to generate training samples. Similarly, the testing samples are randomly chosen from  $I_+^{Te} \subseteq I_+ \setminus I_+^{Tr}$  and  $I_-^{Te} \subseteq I_- \setminus I_-^{Tr}$ . Given the panel  $S = \{s_1, \dots, s_{|S|}\}$  of assays and the set of positive training genomic positions  $I_+^{Tr}$ , we construct the set of positive training samples as  $\mathcal{D}_+^{Tr} = \{x^i, +1\}_{i \in I_+^{Tr}}$  where  $x^i = [s_1(i), \dots, s_{|S|}(i)]^T$ . Similarly, we construct the negative training samples, positive test samples, and negative test samples as  $\mathcal{D}_-^{Tr}$ ,  $\mathcal{D}_+^{Te}$ , and  $\mathcal{D}_-^{Te}$ , respectively. The SVM is first trained on the training data set  $\mathcal{D}^{Tr} = \{\mathcal{D}_+^{Tr}, \mathcal{D}_-^{Tr}\}$ , and then evaluated on the testing data set  $\mathcal{D}^{Te} = \{\mathcal{D}_+^{Te}, \mathcal{D}_-^{Te}\}$ .

Because there are far more genomic positions that are not a functional element than there are positions that are, measures of predictive accuracy such as the total fraction of correct predictions (“accuracy”) and the area under the receiver operating characteristic curve do not offer a reasonable measure of performance. Instead, we compute the area under the curve of a precision-recall plot (AUC-PR), which is particularly well

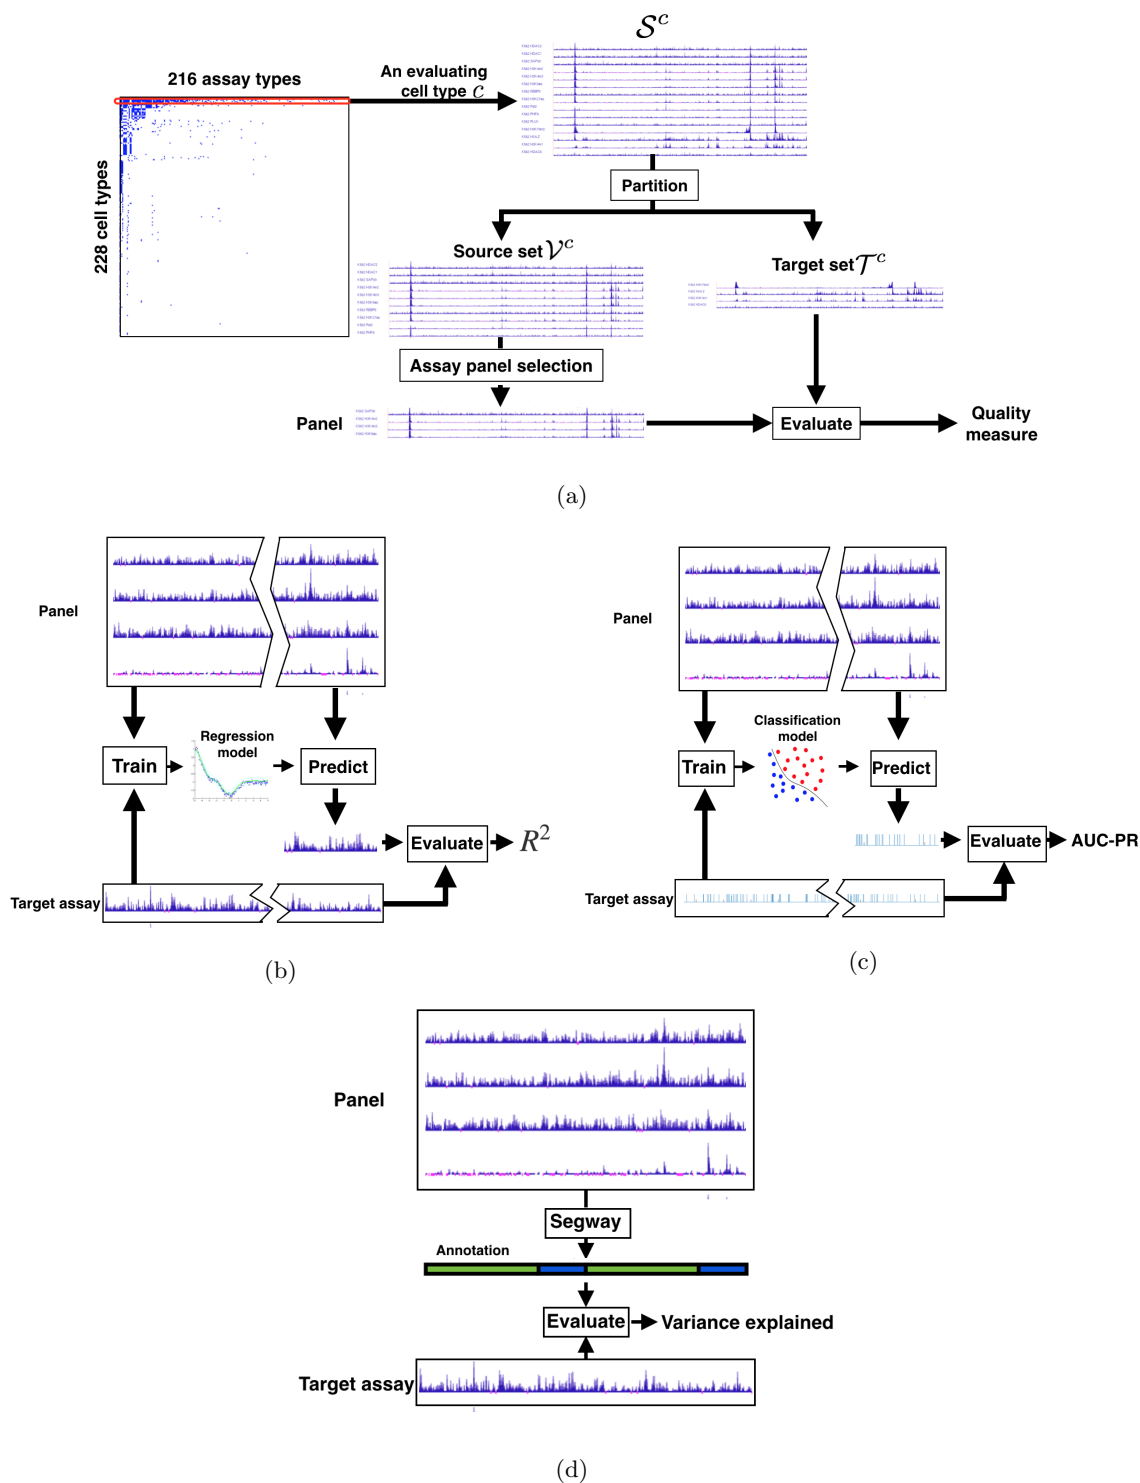

Figure 5: Schematics of (a) the cross-validation evaluation strategy, and the three evaluation metrics: (b) assay imputation, (c) functional element prediction, and (d) annotation-based evaluation.

suited for settings with imbalanced class distributions (Craven and Bockhorst, 2005; Davis and Goadrich, 2006). In our experiments we set  $|I_+^{Tr}| = 200$ ,  $|I_-^{Tr}| = 20,000$ ,  $|I_+^{Te}| = 100$  and  $|I_-^{Te}| = 10,000$ . We apply 5-fold cross validation for tuning the hyperparameters of the SVM. Let  $\gamma_{s'}$  be the normalized area under curve for the precision-recall plot (i.e.,  $\gamma_{s'} \in [0, 1]$ ) for each target assay  $s' \in \hat{\mathcal{T}}^c$ . We illustrate this procedure schematically in Figure 5c. We report the performance as the average AUC-PR on all target assays, i.e.,  $\gamma = \frac{1}{|\hat{\mathcal{T}}^c|} \sum_{s' \in \hat{\mathcal{T}}^c} \gamma_{s'}$ .

## Annotation-based evaluation

The *annotation-based evaluation* metric measures the quality of a panel of genomics assays according to the quality of the genome annotation that is obtained by inputting the panel into a semi-automated genome annotation (SAGA) algorithm. SAGA algorithms are widely used to jointly model diverse genomics data sets. These algorithms take as input a panel of genomics assays and simultaneously partition the genome and label each segment with an integer such that positions with the same label have similar patterns of activity. These algorithms are considered “semi-automated” because a human performs a functional interpretation of the labels after the annotation process. Examples of SAGA methods include HMMSeg (Day et al., 2007), ChromHMM (Ernst and Kellis, 2010), Segway (Hoffman et al., 2012) and others (Thurman et al., 2007; Lian et al., 2008; Filion et al., 2010). These genome annotation algorithms have had great success in interpreting genomics data and have been shown to recapitulate known functional elements including genes, promoters and enhancers. We use the SAGA method Segway in this work.

In order to apply annotation-based evaluation to a panel of assays, we input this panel into a SAGA algorithm and evaluate the resulting annotation (Figure 5d). Intuitively, a diverse panel of assays input to a SAGA algorithm should more accurately capture important biological phenomena than a redundant panel. To evaluate the quality of an annotation relative to a particular genomics data set, we use the *variance explained* measure (Libbrecht et al., 2015). Given an evaluation cell type  $c$  we randomly partition  $\mathcal{S}^c$  into a source set  $\mathcal{V}^c$  and a target set  $\mathcal{T}^c$ . For a given panel of assays  $S \subseteq \mathcal{V}^c$ , we first train a Segway model based on the panel and then obtain an annotation  $y$ . Segway outputs an annotation  $y \in \mathcal{Y}^n$ , where  $\mathcal{Y} = \{1, 2, \dots, k\}$  is a set of  $k$  labels that an annotation can take on at each genomic position. For each target assay  $s' \in \mathcal{T}^c$ , we measure the quality of the annotation  $y$  as how well it explains the variance of the assay  $s'$ . We first compute the signal mean of  $s'$  over the positions assigned a given label  $\ell$  as

$$\mu_\ell \triangleq \frac{\sum_{i=1}^n \mathbf{1}(y(i) = \ell) s'(i)}{\sum_{i=1}^n \mathbf{1}(y(i) = \ell)} \quad \text{for } \ell \in \{1 \dots k\}. \quad (12)$$

We then define a predicted signal vector  $\hat{s}'$  with  $\hat{s}'(i) = \mu_{y(i)}$  and compute the prediction error as  $d_i = \hat{s}'(i) - s'(i)$ . We compute the residual standard deviation of the signal vector as

$$\sigma_{\text{res}} \triangleq \text{stdev}(d_{1:n}) = \sqrt{\frac{1}{n} \sum_{i=1}^n (d_i - \text{mean}(d_{1:n}))^2} = \sqrt{\frac{1}{n} \sum_{i=1}^n d_i^2}. \quad (13)$$

The last equality holds because  $\text{mean}(d_{1:n}) = 0$  by construction.  $\sigma_{\text{res}}$  measures the residual standard deviation of the target assay  $s'$  accounting for the annotation  $y$ . Let  $\sigma_{\text{ov}} = \text{stdev}(s'(1:n))$  be the overall standard deviation of the assay  $s'$ . The normalized variance explained by the annotation  $y$  is then

$$\alpha_{s'} = \frac{\sigma_{\text{ov}} - \sigma_{\text{res}}}{\sigma_{\text{ov}}}. \quad (14)$$

Observe that  $\sigma_{\text{ov}}$  always upper bounds  $\sigma_{\text{res}}$ . The measure  $\alpha_{s'} \in [0, 1]$  represents the fraction of the variance of the assay  $s'$  explained by the annotation  $y$ , where larger values indicate better agreement.

In our experiments, we trained the Segway model with 10 EM random initializations (using GMTK (Bilmes and Rogers, 2015)) and 15 labels at 100 base-pair resolution. We report the performance as the averaged measure on all target assays as  $\alpha = \frac{1}{|\mathcal{T}^c|} \sum_{s' \in \mathcal{T}^c} \alpha_{s'}$ .



## Source code

Source code for SSA and computed assay type similarity matrix are available as Supplemental Material and online at <http://github.com/melodi-lab/Submodular-Selection-of-Assays>.

## References

- Andrés ME, Burger C, Peral-Rubio MJ, Battaglioli E, Anderson ME, Grimes J, Dallman J, Ballas N, and Mandel G. 1999. Corest: a functional corepressor required for regulation of neural-specific gene expression. *Proceedings of the National Academy of Sciences* **96**: 9873–9878.
- Bernstein BE, Stamatoyannopoulos JA, Costello JF, Ren B, Milosavljevic A, Meissner A, Kellis M, Marra MA, Beaudet AL, Ecker JR, et al.. 2010. The NIH Roadmap Epigenomics Mapping Consortium. *Nature Biotechnology* **28**: 1045–1048.
- Bilmes J and Rogers R. 2015. The Graphical Models Toolkit GMTK source distribution. <https://melodi.ee.washington.edu/gmtk>.
- Buchbinder N, Feldman M, Naor J, and Schwartz R. 2012. A tight linear time (1/2)-approximation for unconstrained submodular maximization. In *Foundations of Computer Science (FOCS), 2012 IEEE 53rd Annual Symposium on*, pp. 649–658. IEEE.
- Buchbinder N, Feldman M, Naor JS, and Schwartz R. 2014. Submodular maximization with cardinality constraints. In *Proceedings of the Twenty-Fifth Annual ACM-SIAM Symposium on Discrete Algorithms*, pp. 1433–1452. SIAM.
- Burgess-Beusse B, Farrell C, Gaszner M, Litt M, Mutskov V, Recillas-Targa F, Simpson M, West A, and Felsenfeld G. 2002. The insulation of genes from external enhancers and silencing chromatin. *Proceedings of the National Academy of Sciences of the United States of America* **99**: 16433.
- Carter M. 2001. *Foundations of Mathematical Economics*. The MIT Press.
- Cornuéjols G, Nemhauser GL, and Wolsey LA. 1990. The uncapacitated facility location problem. In *Discrete Location Theory* (eds. P Mirchandani and R Franci), chapter 3. Wiley/Interscience, New York.
- Craven M and Bockhorst J. 2005. Markov networks for detecting overlapping elements in sequence data. *Advances in Neural Information Processing Systems* **17**: 193.
- Davis J and Goadrich M. 2006. The relationship between precision-recall and ROC curves. In *Proceedings of the International Conference on Machine Learning*.
- Day N, Hemmaplardh A, Thurman RE, Stamatoyannopoulos JA, and Noble WS. 2007. Unsupervised segmentation of continuous genomic data. *Bioinformatics* **23**: 1424–1426.
- Edmonds J. 1970. Matroids, submodular functions, and certain polyhedra. *Combinatorial Structures and Their Applications* pp. 69–87.
- ENCODE Project Consortium. 2012. An integrated encyclopedia of DNA elements in the human genome. *Nature* **489**: 57–74.
- Ernst J and Kellis M. 2010. Discovery and characterization of chromatin states for systematic annotation of the human genome. *Nature Biotechnology* **28**: 817–825.
- Ernst J and Kellis M. 2015. Large-scale imputation of epigenomic datasets for systematic annotation of diverse human tissues. *Nature biotechnology* **33**: 364–376.
- Feige U. 1998. A threshold of  $\ln n$  for approximating set cover. *Journal of the ACM* **45**: 634–652.

- Filion GJ, van Bemmelen JG, Braunschweig U, Talhout W, Kind J, Ward LD, Brugman W, de Castro IJ, Kerkhoven RM, Bussemaker HJ, et al.. 2010. Systematic protein location mapping reveals five principal chromatin types in *Drosophila* cells. *Cell* **143**: 212–224.
- Fujishige S. 2005. *Submodular functions and optimization*. Elsevier Science Ltd.
- Gomes R, Krause A, and Perona P. 2010. Discriminative clustering by regularized information maximization. In *Advances in Neural Information Processing Systems*.
- Hoffman MM, Buske OJ, Wang J, Weng Z, Bilmes JA, and Noble WS. 2012. Unsupervised pattern discovery in human chromatin structure through genomic segmentation. *Nature Methods* **9**: 473–476.
- Hoffman MM, Ernst J, Wilder SP, Kundaje A, Harris RS, Libbrecht M, Giardine B, Ellenbogen PM, Bilmes JA, Birney E, et al.. 2013. Integrative annotation of chromatin elements from ENCODE data. *Nucleic Acids Res* **41**: 827–41.
- Johnson NL. 1949. Systems of frequency curves generated by methods of translation. *Biometrika* pp. 149–176.
- Krause A, Singh A, and Guestrin C. 2008. Near-optimal sensor placements in gaussian processes: Theory, efficient algorithms and empirical studies. *The Journal of Machine Learning Research* **9**: 235–284.
- Kundaje A, Meuleman W, Ernst J, Bilenky M, Yen A, Heravi-Moussavi A, Kheradpour P, Zhang Z, Wang J, Ziller MJ, et al.. 2015. Integrative analysis of 111 reference human epigenomes. *Nature* **518**: 317–330.
- Landt SG, Marinov GK, Kundaje A, Kheradpour P, Pauli F, Batzoglou S, Bernstein BE, Bickel P, Brown JB, Cayting P, et al.. 2012. ChIP-seq guidelines and practices of the ENCODE and modENCODE consortia. *Genome Research* **22**: 1813–1831.
- Li B, Carey M, and Workman JLW. 2007. The role of chromatin during transcription. *Cell* **128**: 707–719.
- Lian H, Thompson W, Thurman RE, Stamatoyannopoulos JA, Noble WS, and Lawrence C. 2008. Automated mapping of large-scale chromatin structure in ENCODE. *Bioinformatics* **24**: 1911–1916.
- Libbrecht M, Ay F, Hoffman MM, Gilbert DM, Bilmes JA, and Noble WS. 2015. Joint annotation of chromatin state and chromatin conformation reveals relationships among domain types and identifies domains of cell-type-specific expression. *Genome Research* **25**: 544–557.
- Lin H and Bilmes J. 2012. Learning mixtures of submodular shells with application to document summarization. In *Uncertainty in Artificial Intelligence (UAI)*. AUAI, Catalina Island, USA.
- Liu Y, Wei K, Kirchhoff K, Song Y, and Bilmes J. 2013. Submodular feature selection for high-dimensional acoustic score spaces. In *Acoustics, Speech and Signal Processing (ICASSP), 2013 IEEE International Conference on*, pp. 7184–7188. IEEE.
- Lovász L. 1983. Submodular functions and convexity. In *Mathematical Programming – The State of the Art* (eds. MG A Bachem and B Korte), pp. 235–257. Springer-Verlag.
- Minoux M. 1978. Accelerated greedy algorithms for maximizing submodular set functions. *Optimization Techniques* pp. 234–243.
- Mirzasoleiman B, Karbasi A, Sarkar R, and Krause A. 2013. Distributed submodular maximization: Identifying representative elements in massive data. In *Advances in Neural Information Processing Systems*.
- Narasimhan M and Bilmes J. 2005. A Submodular-Supermodular Procedure with Applications to Discriminative Structure Learning. In *Uncertainty in Artificial Intelligence (UAI)*. Morgan Kaufmann Publishers, Edinburgh, Scotland.
- Narayanan H. 1997. Submodular functions and electrical networks. *Annals of Discrete Mathematics* **54**.

- Nemhauser G, Wolsey L, and Fisher M. 1978a. An analysis of approximations for maximizing submodular set functions—I. *Mathematical Programming* **14**: 265–294.
- Nemhauser GL, Wolsey LA, and Fisher ML. 1978b. An analysis of approximations for maximizing submodular set functions. *Mathematical Programming* **14**: 265–294.
- Schrijver A. 2004. *Combinatorial Optimization*. Springer.
- scienceexchange. 2015. ChIP-seq prices at scienceexchange.com. <https://www.scienceexchange.com/services/chip-seq>.
- Shapley LS. 1971. Cores of convex games. *International Journal of Game Theory* **1**: 11–26.
- Thurman RE, Day N, Noble WS, and Stamatoyannopoulos JA. 2007. Identification of higher-order functional domains in the human ENCODE regions. *Genome Research* **17**: 917–927.
- Topkis DM. 1998. *Supermodularity and complementarity*. Princeton University Press.
- UniProt Consortium. 2014. UniProt: a hub for protein information. *Nucleic acids research* p. gku989.
- Visel A, Blow MJ, Li Z, Zhang T, Akiyama JA, Holt A, Plajzer-Frick I, Shoukry M, Wright C, Chen F, et al.. 2009. ChIP-seq accurately predicts tissue-specific activity of enhancers. *Nature* **457**: 854–858.
- Vives X. 2001. *Oligopoly pricing: Old ideas and new tools*. The MIT Press.
- Wei K, Liu Y, Kirchhoff K, Bartels C, and Bilmes J. 2014. Submodular subset selection for large-scale speech training data. In *Acoustics, Speech and Signal Processing (ICASSP), 2014 IEEE International Conference on*, pp. 3311–3315. IEEE.
- Zhang Y, Liu T, Meyer CA, Eeckhoute J, Johnson DS, Bernstein BE, Nusbaum C, Myers RM, Brown M, Li W, et al.. 2008. Model-based analysis of ChIP-Seq (MACS). *Genome Biology* **9**: R137.
